# Supplementary material
Source: PubMed Central journal article supplement (PMC6601213)

## A

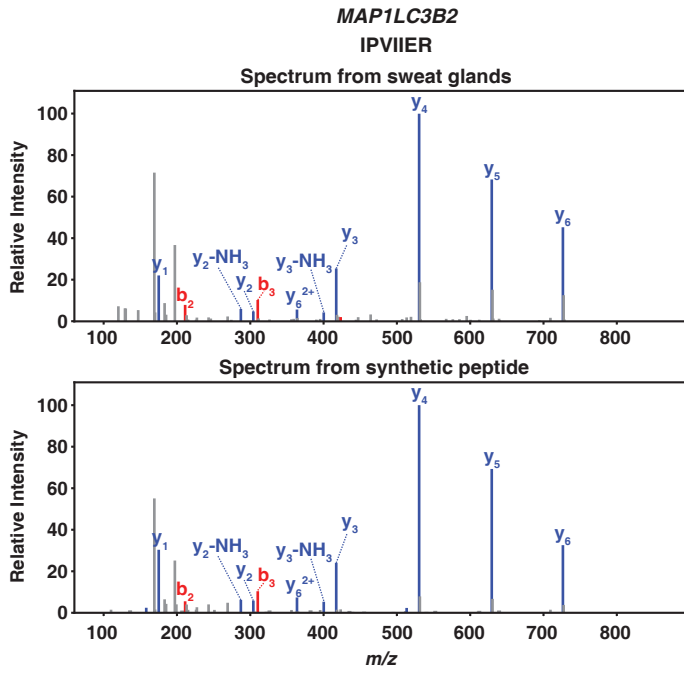

## B

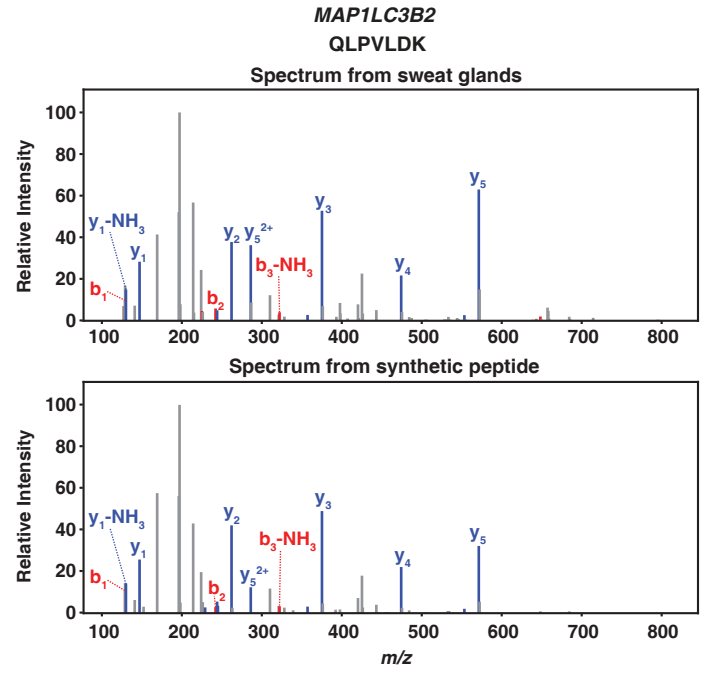

## C

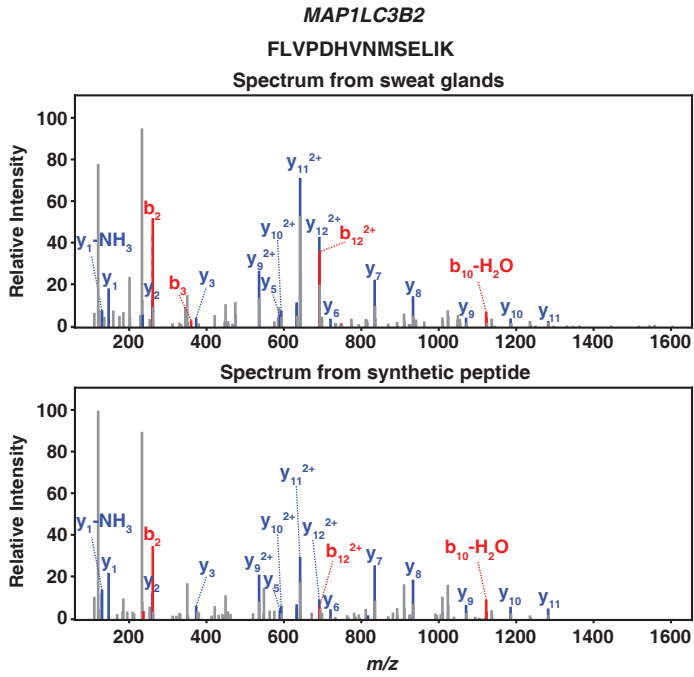

## D

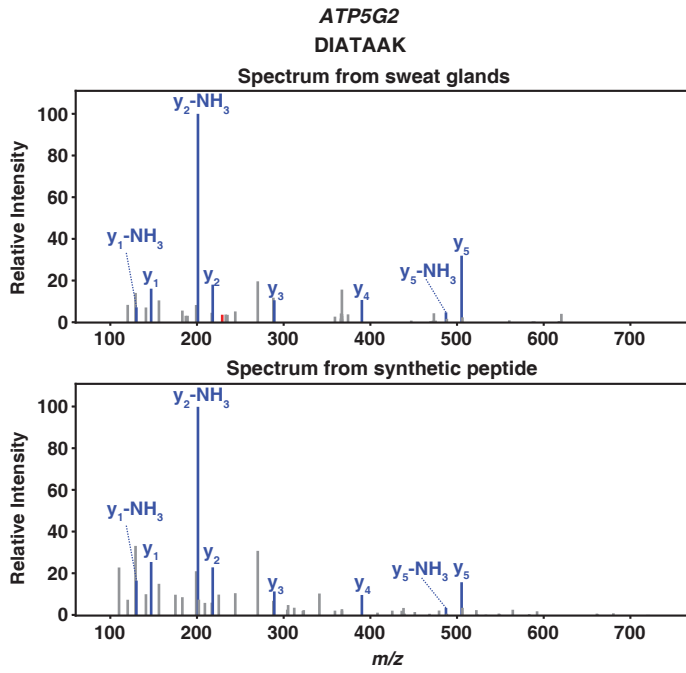

## E

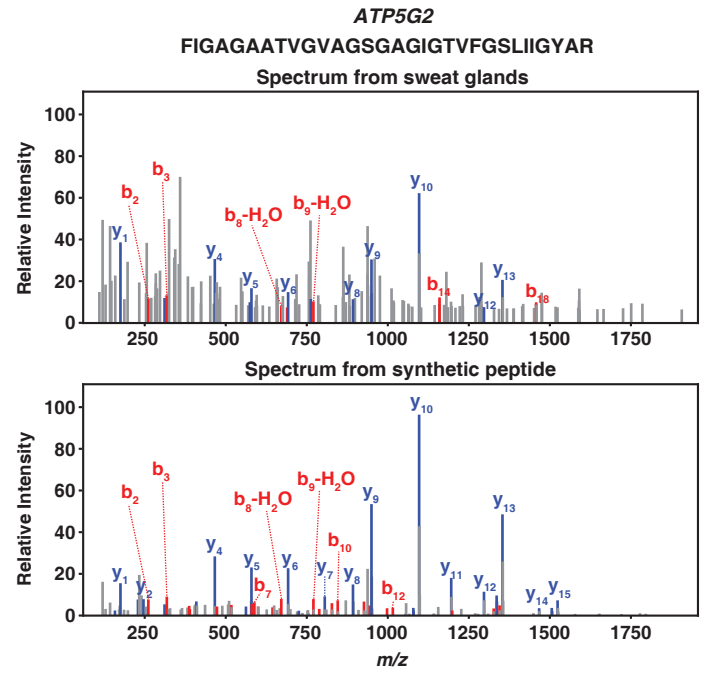

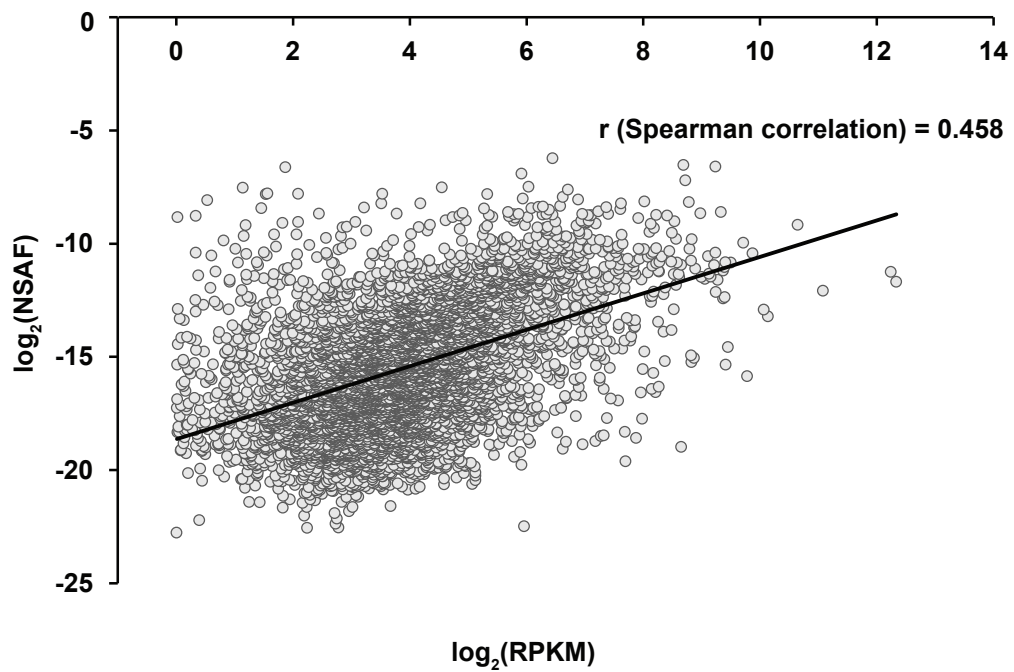

Supplement: 140888_1_supp_303794_pysg78.pdf [file 140888_1_supp_303794_pysg78.pdf]
